# Supplementary material for: Adaptive evolution of proteins in hepatitis B virus during divergence of genotypes
Source: PubMed Central journal article supplement (PMC5434055; doi:10.1038/s41598-017-02012-8), 2017-05-16
Supplement: 41598_2017_2012_MOESM1_ESM.pdf [file 41598_2017_2012_MOESM1_ESM.pdf]

# Supplementary figures

## **Adaptive evolution of proteins in hepatitis B virus during divergence of genotypes**

Shengdi Li<sup>1,2</sup>, Zhen Wang<sup>1</sup>, Yixue Li<sup>#,1,3</sup>, Guohui Ding<sup>#,1,3</sup>

<sup>1</sup>Key Laboratory of Computational Biology, CAS-MPG Partner Institute for Computational Biology, Shanghai Institutes for Biological Sciences, Chinese Academy of Sciences, 320 Yue Yang Road, 200031 Shanghai, China;

<sup>2</sup>University of Chinese Academy of Sciences, Beijing, China;

<sup>3</sup>Shanghai Center for Bioinformation Technology, Shanghai Industrial Technology Institute, 1278 Keyuan Road, 201203 Shanghai, China;

<sup>#</sup>Correspondence: Guohui Ding ([gwding@sibs.ac.cn](mailto:gwding@sibs.ac.cn)), Yixue Li ([yxli@sibs.ac.cn](mailto:yxli@sibs.ac.cn)).

**AB116079:**  
**A-A-A-A-A-A-A-A-A-A-A**

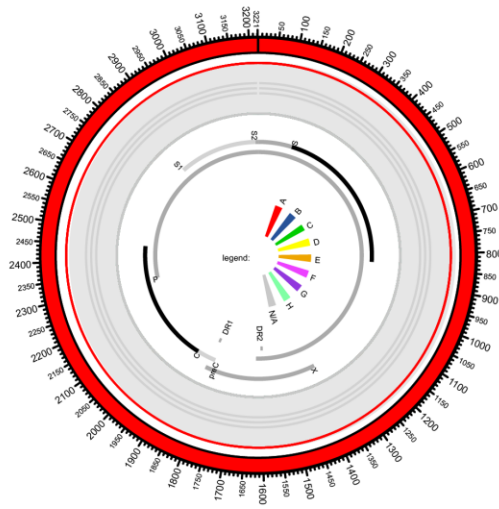

**AB113877:**  
**C-C-C-C-C-C-C-C-C-C-C**

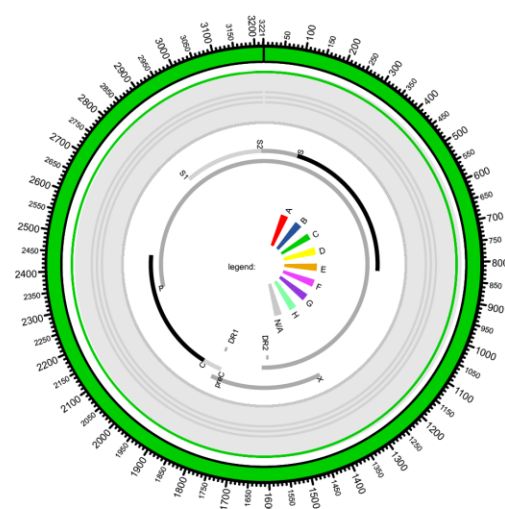

**JQ272886:**  
**F-F-G-G-G-G-G-G-G-G-G**

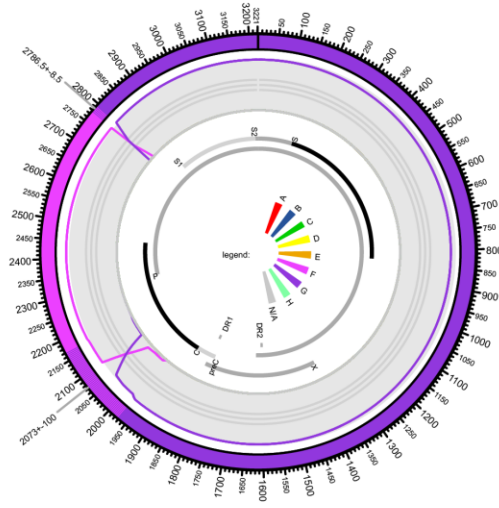

**DQ993705:**  
**C-B-B-B-B-B-B-B-B-B-C**

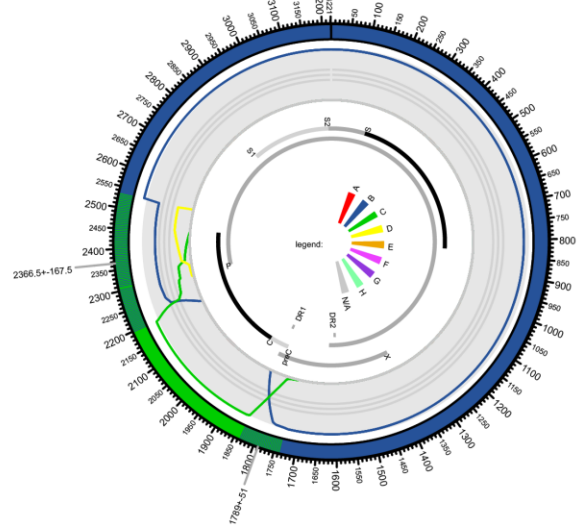

**Supplementary figure S1. Visualization of pure-genotypic strains and inter-genotypic recombinants by jpHMM.**

The genotype plots of two pure strains (AB116079, AB113877) and two inter-genotypic recombinants (JQ272886, DQ993705) generated by jpHMM. The fragmental genotypes (13 characters) predicted by fragment typing are displayed accordingly.

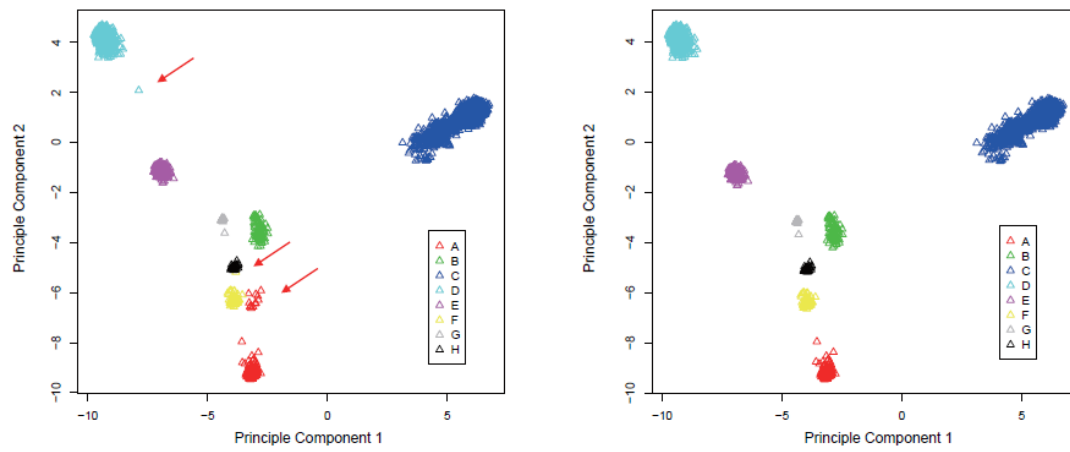

**Supplementary figure S2. Removal of population outliers.**

The genetic relationship of 3006 genomes before removing outliers (left) and 2992 genomes in final dataset (right) revealed by PCA. Population outliers were indicated by arrows.

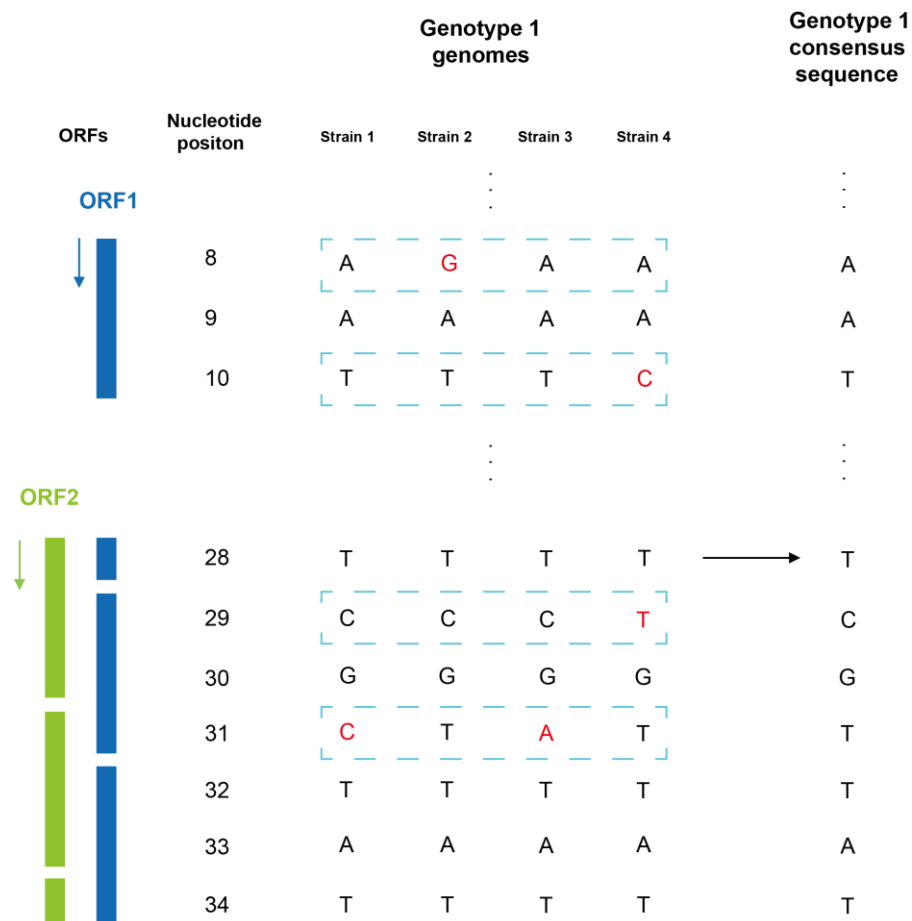

| Polymorphic variant No. | Position | Variant | Codon change                      | Amino acid change                 | Variant type |
|-------------------------|----------|---------|-----------------------------------|-----------------------------------|--------------|
| No. 1                   | 8        | A->G    | ORF1: AAT->GAT                    | ORF1: Asn->Asp                    | NNS          |
| No. 2                   | 10       | T->C    | ORF1: AAT->AAC                    | ORF1: Asn->Asn                    | synonymous   |
| No. 3                   | 29       | C->T    | ORF1: CGT->TGT,<br>ORF2: TCG->TTG | ORF1: Arg->Cys,<br>ORF2: Ser->Leu | DNS          |
| No. 4                   | 31       | T->C    | ORF1: CGT->CGC,<br>ORF2: TTA->CTA | ORF1: Arg->Arg,<br>ORF2: Leu->Leu | synonymous   |
| No. 5                   | 31       | T->A    | ORF1: CGT->CGA,<br>ORF2: TTA->ATA | ORF1: Arg->Arg,<br>ORF2: Leu->Ile | INS          |

**Supplementary figure S3. Example of determining four categories of polymorphic variants.**

This is an example on determination of NNS, DNS, INS and synonymous variants. The template dataset contains 4 strains from fictional genotype 1. Polymorphic sites are indicated in dashed boxes and variants distinguished from consensus sequence are marked as red. The codons of two open reading frames (ORF1 and ORF2) are showed as blue and green bars.

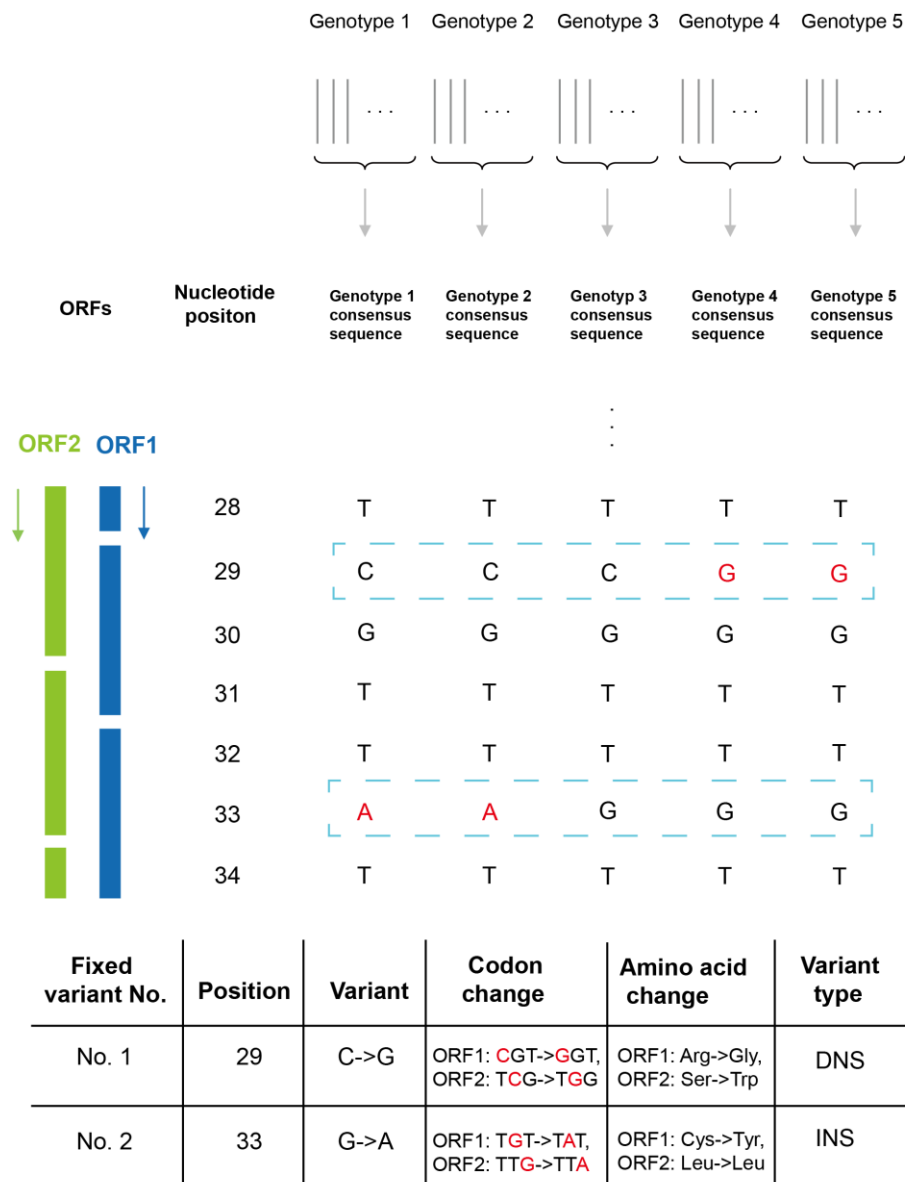

**Supplementary figure S4. Example of determining fixed variants.**

The consensus sequences of each genotype were first generated and aligned. Fixed variants were then identified similarly as **Supplementary figure S3**.
